# Supplementary material for: Construction of tissue-engineered nucleus pulposus by stimulation with periodic mechanical stress and BMP-2
Source: PubMed Central journal article supplement — iScience. 2022 May 13;25(6):104405. doi: 10.1016/j.isci.2022.104405 (PMC9136668; doi:10.1016/j.isci.2022.104405), 2022-05-13
Supplement: mmc1.pdf [file mmc1.pdf]

**iScience, Volume 25**

**Supplemental information**

**Construction of tissue-engineered nucleus  
pulposus by stimulation with periodic  
mechanical stress and BMP-2**

**Yang Liu, Gong-ming Gao, Kai-yuan Yang, and Lu-ming Nong**

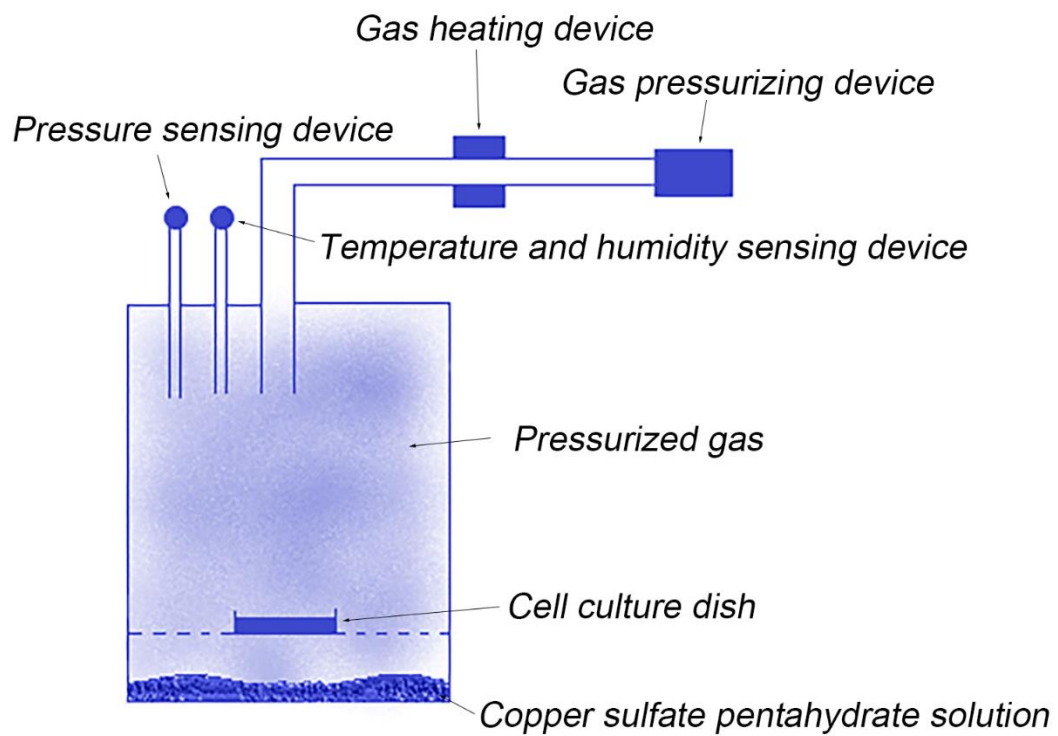

Figure S1

**Figure S1. Schematic of stress field culture system, Related to STAR Methods.**

Please contact the Lead contact to obtain the device's primary parameters and build method, if you want to request the device.

## Determination of sustained release performance of scaffolds

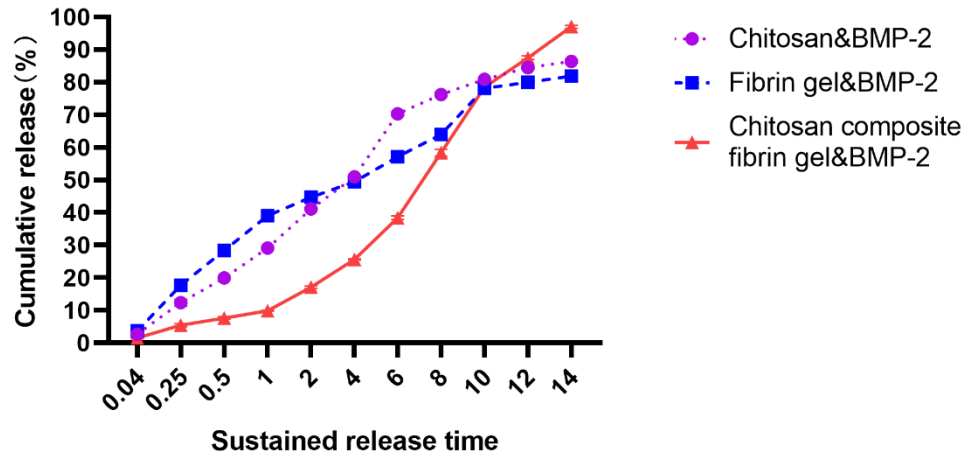

Figure S2

**Figure S2. Determination of sustained release performance of scaffolds, Related to Figure 4.**

In the chitosan microsphere group and the fibrin gel scaffold group, BMP-2 was released rapidly in the early stage (within 2 days), then slowly released in the following 2-10 days, and reached a plateau in the last 4 days and finally released completely in 11-14 days. However, in the chitosan composite fibrin gel scaffold group, the release of BMP-2 was slow in the early stage (within 1 day), followed by a uniform release within 1-10 days, and gradually slowed down in the last 4 days, but the sustained release was not complete. Results are presented as the mean  $\pm$  SD of three independent experiments.
